# Supplementary material
Source: HighWire-hosted journal article supplement (https://cancerdiscovery.aacrjournals.org/content/suppl/2014/08/08/2159-8290.CD-14-0098)

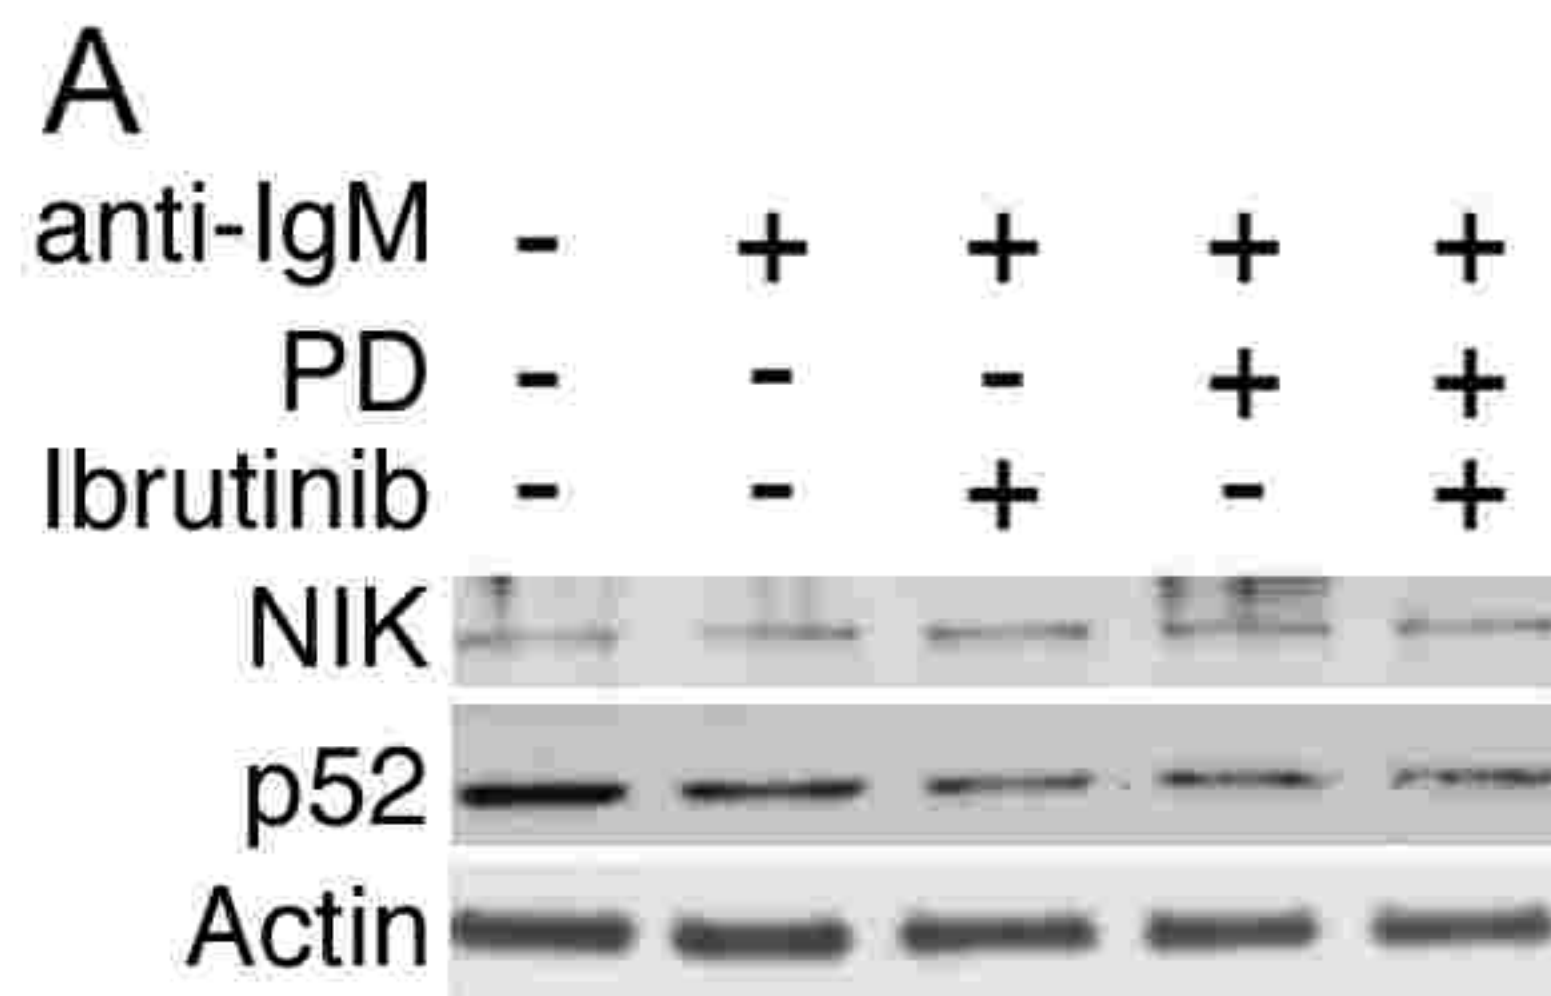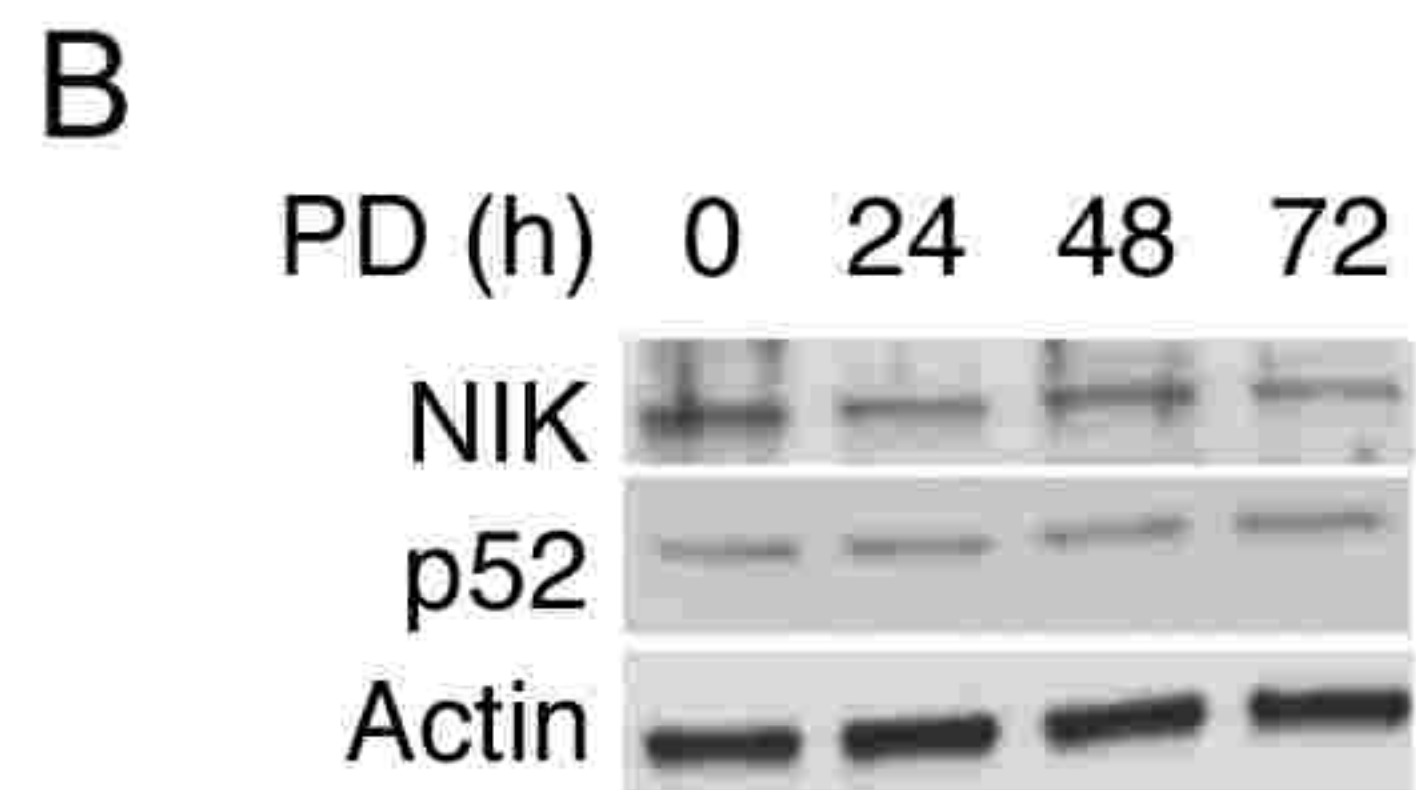

Supplement: 125066_1_supp_0_n9y0ff.pdf [file 125066_1_supp_0_n9y0ff.pdf]
